# Supplementary material
Source: PubMed Central journal article supplement (PMC3612378)
Supplement: NIHMS394873-supplement-supplement_1.pdf [file NIHMS394873-supplement-supplement_1.pdf]

## SUPPLEMENTAL TABLES

Supplemental Table 1. Association of final model covariates with left ventricular mass.

|                   | Adjusted difference in left<br>ventricular mass (grams) | P-value |
|-------------------|---------------------------------------------------------|---------|
| Age (per year)    | -0.5                                                    | <0.001  |
| Male <sup>1</sup> | +45.0                                                   | <0.001  |
| Race              |                                                         |         |
| White             | <i>reference</i>                                        |         |
| Black             | +6.4                                                    | <0.001  |
| Hispanic          | -12.0                                                   | <0.001  |
| Asian             | -2.9                                                    | 0.018   |
| Diabetes status   |                                                         |         |
| Normal            | <i>reference</i>                                        |         |
| Impaired glucose  | -2.9                                                    | 0.003   |
| Diabetes          | -1.4                                                    | 0.295   |
| Education         |                                                         |         |
| ≤High school      | <i>reference</i>                                        |         |
| Some college      | +3.5                                                    | 0.005   |
| ≥ College         | +3.5                                                    | 0.010   |
| Smoking           |                                                         |         |
| Never             | <i>reference</i>                                        |         |
| Former            | +1.0                                                    | 0.294   |
| Current           | +8.3                                                    | <0.001  |

|                                                         |                  |        |
|---------------------------------------------------------|------------------|--------|
| Alcohol use                                             |                  |        |
| None                                                    | <i>reference</i> |        |
| 0-7 drinks per week                                     | +0.6             | 0.512  |
| >7 drinks per week                                      | +2.0             | 0.107  |
| Physical activity <sup>2</sup>                          | +0.04            | <0.001 |
| Body mass index (per 1 kg/m <sup>2</sup> ) <sup>3</sup> | +2.4             | <0.001 |
| Systolic blood pressure (per mmHg)                      | +3.0             | <0.001 |
| Hypertension medication use                             | +4.2             | <0.001 |
| Estimated GFR (per ml/min/1.73m <sup>2</sup> )          | +0.0             | 0.748  |
| Urine albumin to creatinine ratio (mg/g) <sup>4</sup>   | +4.6             | <0.001 |
| C-reactive protein (mg/L) <sup>4</sup>                  | -1.7             | <0.001 |
| Total calories (kcal/day) <sup>4</sup>                  | -1.3             | 0.610  |
| Dietary sodium (mg/day) <sup>4</sup>                    | -1.6             | 0.349  |

<sup>1</sup>Final models stratified by sex given large differences in LVM between men and women

<sup>2</sup>Metabolic equivalent task minutes per week of moderate-vigorous physical activity / 100

<sup>3</sup>Final models adjust for height and weight separately

<sup>4</sup>Per doubling (natural log transformed)

Supplemental Table 2. Association of final model covariates with left ventricular hypertrophy.

|                   | Adjusted odds ratio for left<br>ventricular hypertrophy | P-value |
|-------------------|---------------------------------------------------------|---------|
| Age (per year)    | 1.0                                                     | 0.628   |
| Male <sup>1</sup> | 0.9                                                     | 0.400   |
| Race              |                                                         |         |
| White             | <i>reference</i>                                        |         |
| Black             | 1.7                                                     | 0.001   |
| Hispanic          | 1.6                                                     | 0.012   |
| Asian             | 0.6                                                     | 0.026   |
| Diabetes status   |                                                         |         |
| Normal            | <i>reference</i>                                        |         |
| Impaired glucose  | 0.9                                                     | 0.298   |
| Diabetes          | 1.0                                                     | 0.803   |
| Education         |                                                         |         |
| ≤High school      | <i>reference</i>                                        |         |
| Some college      | 1.2                                                     | 0.221   |
| ≥ College         | 1.2                                                     | 0.329   |
| Smoking           |                                                         |         |
| Never             | <i>reference</i>                                        |         |
| Former            | 1.1                                                     | 0.700   |
| Current           | 1.8                                                     | 0.001   |

|                                                       |                  |        |
|-------------------------------------------------------|------------------|--------|
| Alcohol use                                           |                  |        |
| None                                                  | <i>reference</i> |        |
| 0-7 drinks per week                                   | 1.1              | 0.496  |
| >7 drinks per week                                    | 0.8              | 0.239  |
| Physical activity <sup>2</sup>                        | 1.0              | 0.010  |
| Systolic blood pressure (per mmHg)                    | 1.02             | <0.001 |
| Hypertension medication use                           | 1.5              | 0.001  |
| Estimated GFR (per ml/min/1.73m <sup>2</sup> )        | 1.01             | 0.013  |
| Urine albumin to creatinine ratio (mg/g) <sup>3</sup> | 1.5              | <0.001 |
| C-reactive protein (mg/L) <sup>3</sup>                | 0.9              | 0.092  |
| Total calories (kcal/day) <sup>3</sup>                | 1.5              | 0.255  |
| Dietary sodium (mg/day) <sup>3</sup>                  | 0.6              | 0.022  |

<sup>1</sup>Final models stratified by sex given large differences in LVM between men and women

<sup>2</sup>Metabolic equivalent task minutes per week of moderate-vigorous physical activity / 100

<sup>3</sup>Per doubling (natural log transformed)

**Supplemental table 3. Classification of food frequency items by protein and processed food category.**

| Type of protein | Processed food status | Food Items                                                                                                                                                                                                                                   |
|-----------------|-----------------------|----------------------------------------------------------------------------------------------------------------------------------------------------------------------------------------------------------------------------------------------|
| Animal          | Processed             | Sausage, pancakes, bran muffin, biscuits, Chinese dumplings, chow mein, stir-fried shrimp, meat burritos, pasta with tomato and meat sauce, pizza, hamburger, ham hocks, ham, fried chicken, liver, gravy, fried fish, shrimp, tuna, pudding |
| Animal          | Unprocessed           | Eggs, meat enchiladas, picadillo, arrozconpollo, red or green chili with meat, meat or fish stew, chicken salad, steak, roast chicken, boiled fish, stir-fried beef                                                                          |
| Dairy           | Processed             | Flavored yogurt, cream soup, pasta with cream with or without meat sauce, ice cream, frozen yogurt, sweet condensed milk                                                                                                                     |
| Dairy           | Unprocessed           | Cottage cheese, cheddar, plain yogurt, whole or 2% or skim milk, milk or cream in coffee or tea                                                                                                                                              |

|             |             |                                                                                                                                                                                                                                                                                                                                                                                                                                                |
|-------------|-------------|------------------------------------------------------------------------------------------------------------------------------------------------------------------------------------------------------------------------------------------------------------------------------------------------------------------------------------------------------------------------------------------------------------------------------------------------|
| Vegetable   | Processed   | Fried rice, stir-fried tofu, burritos, enchiladas, chili, refried beans, tofu dessert, instant breakfast, hot cocoa                                                                                                                                                                                                                                                                                                                            |
| Vegetable   | Unprocessed | Oatmeal, other hot cereal, cold cereal, dark bread, nuts, sunflower seeds, peanuts, pea soup, miso soup, hominy, beans, brown rice, soy milk, pasta salad                                                                                                                                                                                                                                                                                      |
| Non-protein | Processed   | Chips, crackers, salsa, tortilla, pasta with tomato sauce, white donuts, pies, soda (regular or diet), French fries, Oriental noodles, candy                                                                                                                                                                                                                                                                                                   |
| Non-protein | Unprocessed | Peaches, cantaloupe, strawberries, apples, bananas, oranges, dried or other fruit, orange or other juice, white bread, margarine or butter on rolls, other soup, lettuce or spinach salad, tomatoes, avocado, carrots, broccoli, green beans, squash, other vegetables, white rice, potato, sweet potato, butter on vegetables, stir-fried vegetables, sugar on bread, coffee, herbal or black tea, sugar in coffee or tea, wine, beer, liquor |
